# Supplementary material
Source: PubMed Central journal article supplement (PMC7659194)
Supplement: CAS-103-797-s001.pdf [file CAS-103-797-s001.pdf]

## Supplement figure 3. Fuyuhiko Y. et al

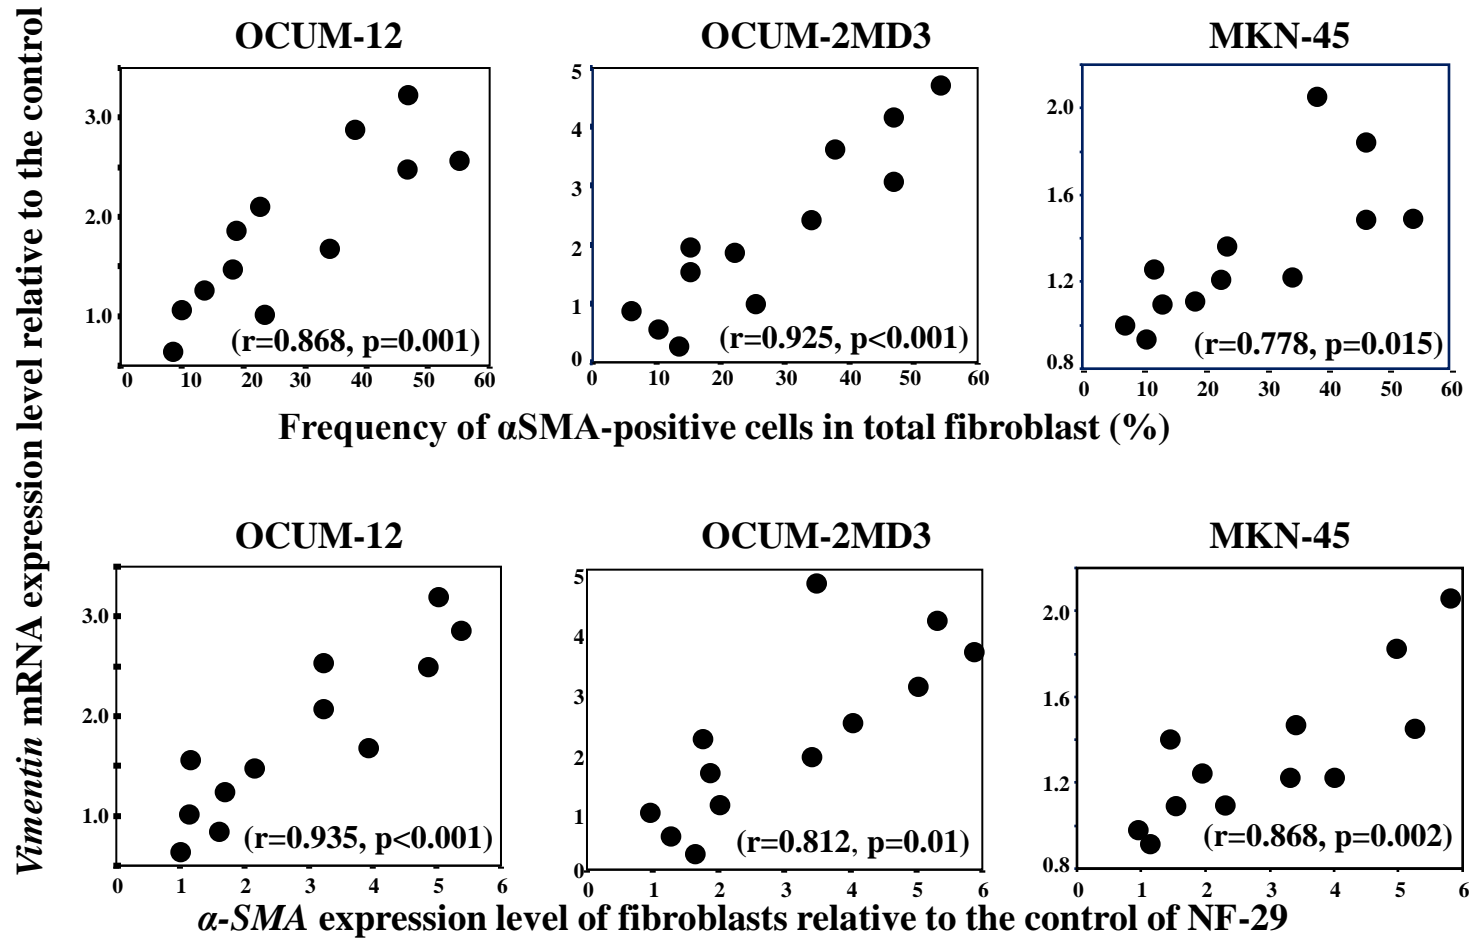

**Supplement figure 3. Correlation between *vimentin* expression and  $\alpha$ SMA expression in gastric cancer cells.** A significant correlation was found between the *vimentin* expression and  $\alpha$ SMA expression in gastric cancer cells.
