# Supplementary material
Source: PubMed Central journal article supplement (PMC7659194)
Supplement: CAS-103-797-s002.pdf [file CAS-103-797-s002.pdf]

## Supplement figure 2. Fuyuhiko Y. et al

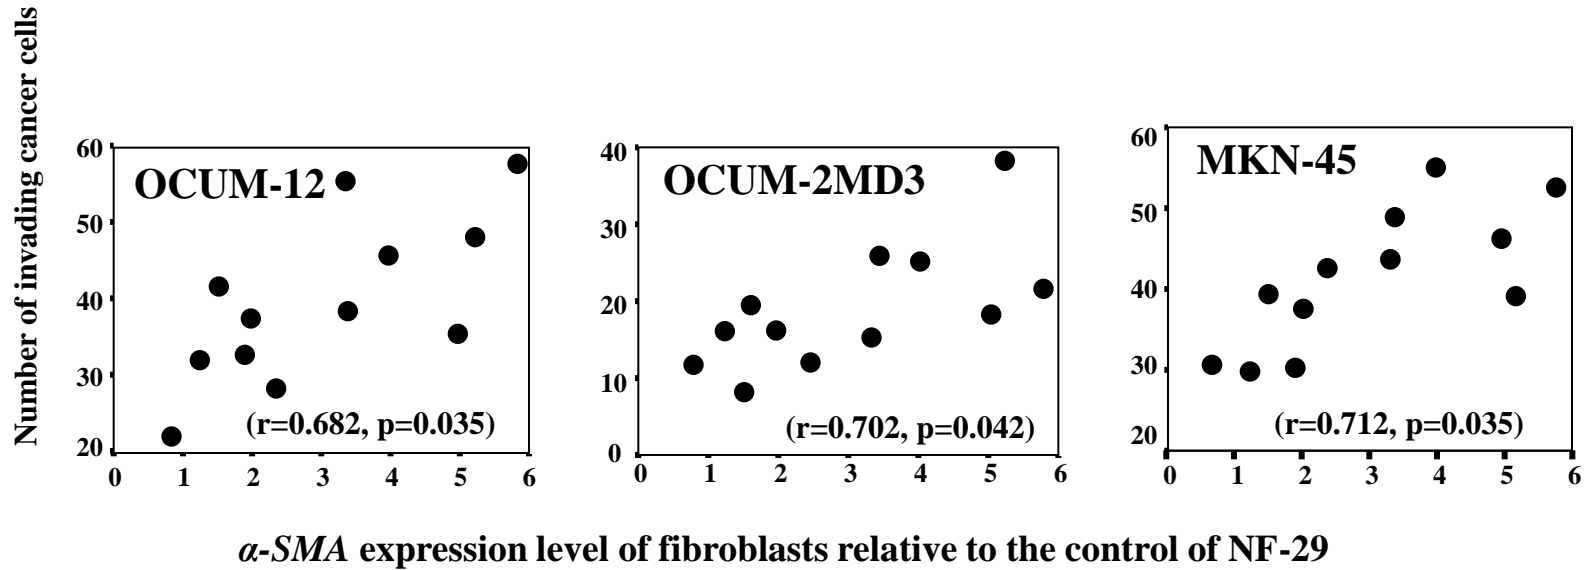

**Supplement figure 2. Correlation between invasion ability of gastric cancer cells and  $\alpha$ SMA expression of fibroblasts.** The invasion ability of gastric cancer cells was significantly correlated with the  $\alpha$ SMA expression of fibroblasts by Pearson's correlation coefficient analysis.
