# Supplementary material
Source: PubMed Central journal article supplement (PMC7659194)
Supplement: CAS-103-797-s003.pdf [file CAS-103-797-s003.pdf]

## Supplement figure 1. Fuyuhiko Y. et al

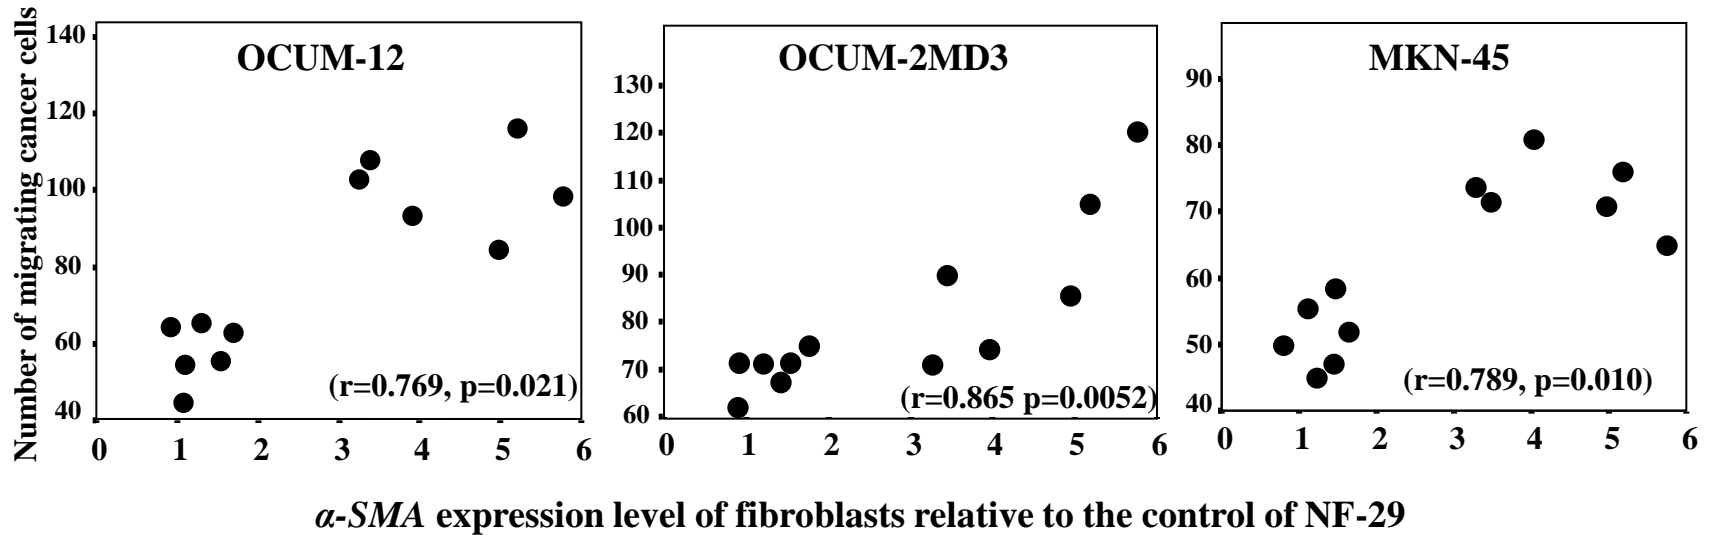

**Supplement figure 1. Correlation between migratory ability of gastric cancer cells and  $\alpha$ SMA expression of fibroblasts.** The migratory ability of gastric cancer cells was significantly correlated with the  $\alpha$ SMA expression of fibroblasts by Pearson's correlation coefficient analysis.
